# Supplementary material for: Calpains Induce Egg Production Through Mirnas Secretion in Extracellular Vesicles Released From Paired Adult Worms of Schistosoma Japonicum
Source: Research Square preprint supplement (doi:10.21203/rs.3.rs-783057/v1), 2021-08-10
Supplement: Supplementary file 1 [file 7744f96e228d9d0b7d2f8d26.pdf]

# Supplemental Figure 1

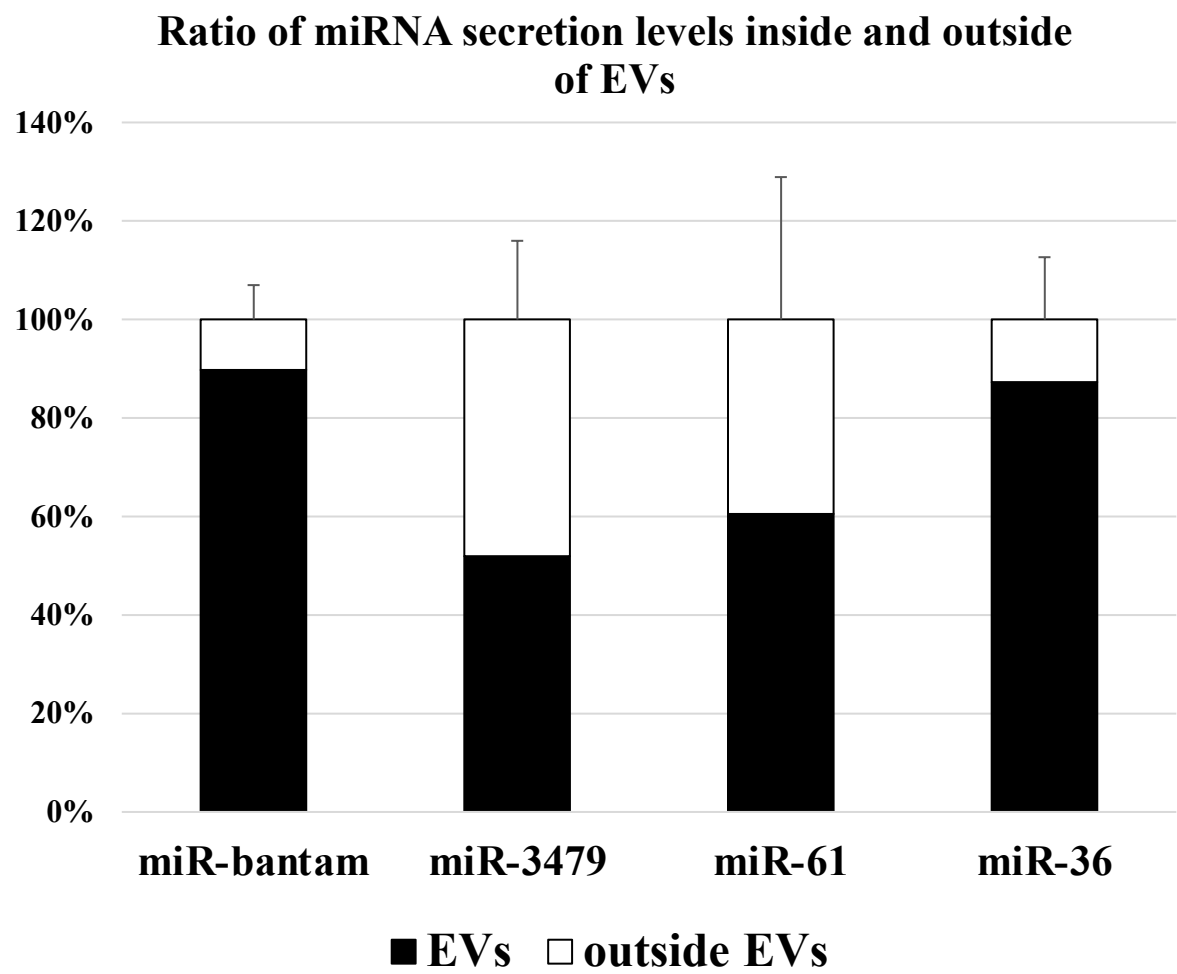

**Fig. S1 Ratio of miRNA secretion inside and outside the EVs using phosphatidylserine (PS)-targeted column.** EVs collected from 3 paired adult worms in triplicate were purified using a commercial PS-captured column (WAKO). The flow-through fractions were also collected after the PS-capture procedure. Both PS-captured fractions and flow-through fractions were used for RNA extractions. miRNAs were detected using the same procedure of Materials and Methods. The mean and standard error were obtained from the relative value of the absolute amount of miRNA detected outside the EVs to the amount of miRNA in the EVs. Data were expressed as percentages of the total.

# Supplemental Figure 2

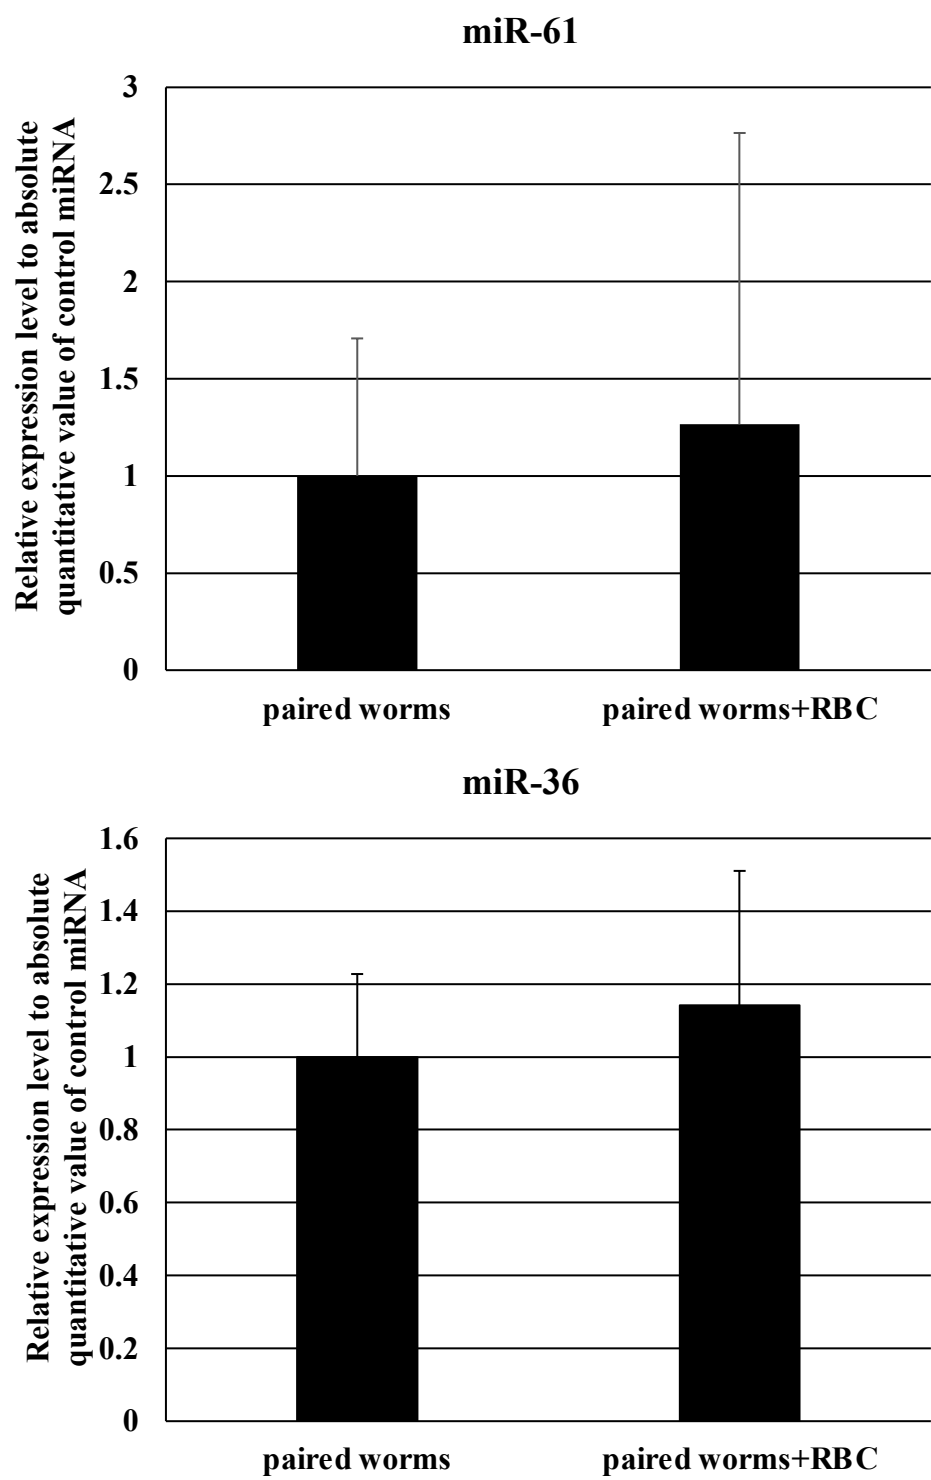

**Fig. S2 Unchanged miRNA expression levels in EVs released from adult worms with erythrocytes.** Absolute quantification qRT–PCR analyses of miRNAs (A) miR-61, (B) miR-36 compared with paired worm group. Data were not a significant difference between two groups. Data illustrate representative findings and show the mean and standard errors derived from 5 groups.

# Supplemental Figure 3

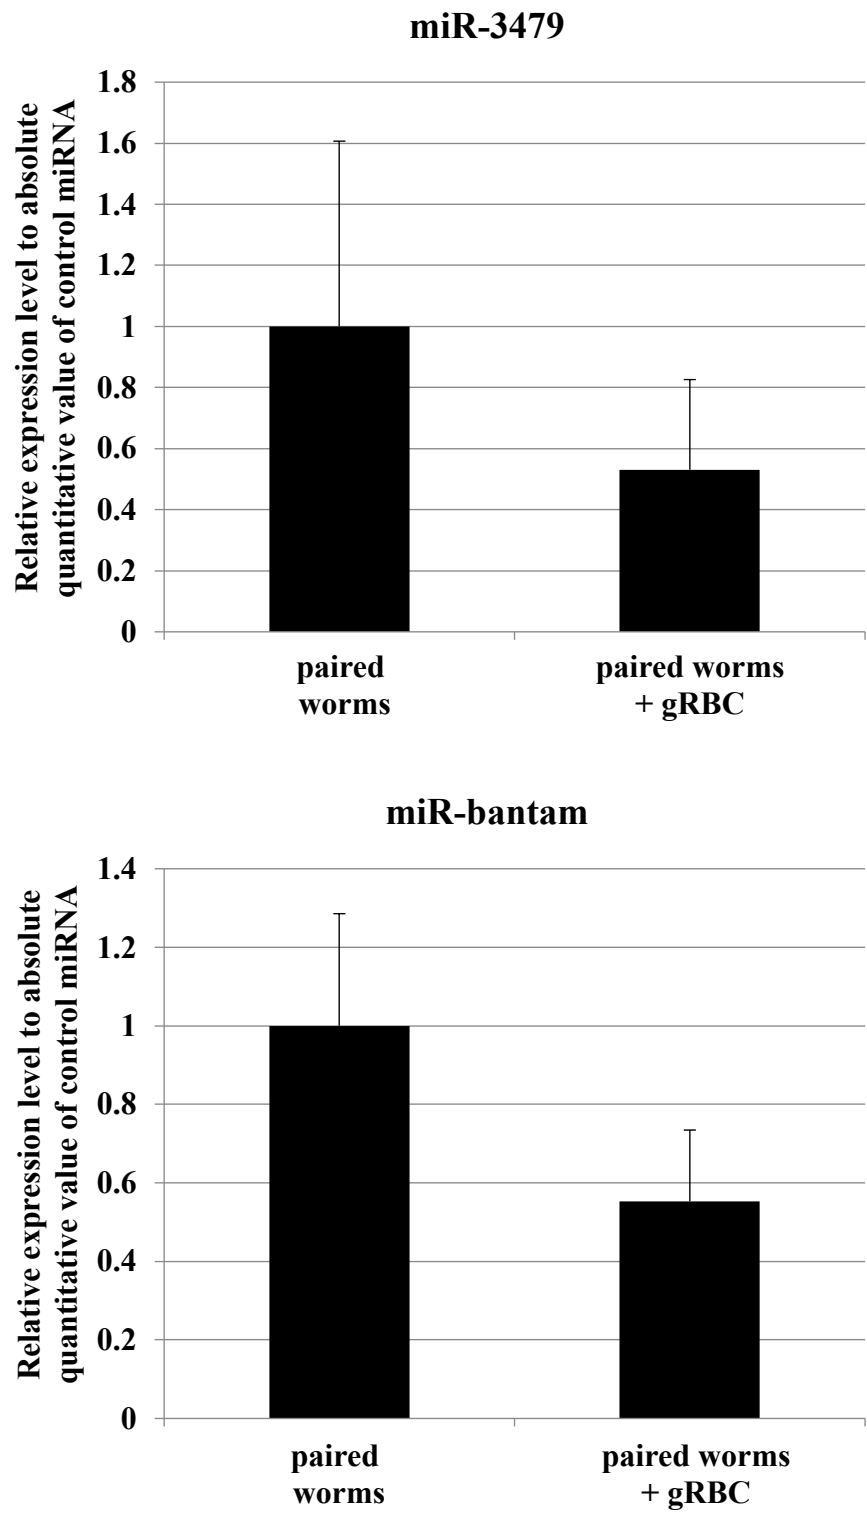

**Fig. S3 miRNA expression levels in the EVs released from adult worms with ghost erythrocytes (RBCs).** Absolute quantification qRT-PCR analyses of miRNAs (A) miR-3479, (B) miR-bantam compared with paired worm group. Data were not a significant difference between treated with ghost RBCs and untreated. Data illustrate representative findings and show the mean and standard errors derived from 3 groups.

Supplemental Table 1

| Forward primers | Sequense (5'→3')     | miRBase accession NO. |
|-----------------|----------------------|-----------------------|
| miR-bantam      | tgagatcgcgattaaagc   | MIMAT0010177          |
| miR-3479-3p     | tattgcacttaccttcgcc  | MIMAT0016275          |
| miR-61          | tgactagaaagtgcactcac | MIMAT0016259          |
| miR-36-3p       | caccgggtagacattc     | MIMAT0016257          |

Table S1 Primers sequences.
